# Supplementary material
Source: publisher site journal article supplement (https://www.dovepress.com/get_supplementary_file.php?f=282348.docx)
Supplement: Supplementary file 1 [file get_supplementary_file.php]

Supplementary Table 1 The clinicopathological features of esophageal cancer

| Characteristics | No.  n(%) | *P* |
| --- | --- | --- |
| Total | 45 |  |
| Age(years) |  |  |
| ⩽ 50 | 19 | 0.072 |
| > 50 | 26 |  |
| Sex |  |  |
| male | 24 | 0.089 |
| Female | 21 |  |
| TNM stage |  |  |
| I and II | 10 | 0.0098 |
| III and IV | 35 |  |
| Histological grade |  |  |
| G1 | 9 | 0.0075 |
| G2/G3 | 36 |  |
| History of smoking |  |  |
| ever | 22 | 0.099 |
| Never | 23 |  |
| Lymph node metastasis |  |  |
| No | 35 | 0.0098 |
| Yes | 10 |  |
